# Supplementary material for: Effect of Warm-Dry Storage And Supplemental Application of Gibberellins on The Lipid Profile of Chincuya Seeds (Annona purpurea Moc. & Sessé ex Dunal)
Source: Preprints.org preprint supplement (doi:10.20944/preprints202402.0479.v1), 2024-02-08
Supplement: Supplementary file 1 [file supplementary]

Table 3. Fatty acid content of seeds of *Annona purpurea* (chincuya).

| Fatty acid percent | | | | | | | | |
| --- | --- | --- | --- | --- | --- | --- | --- | --- |
| Saturated | | |  | Unsaturated | | |  |  |
| Palmitic Acid (C16:0) | Estearic Acid (C18:0) | Arachidic Acid (C20:0) | Total Satured Fatty Acid (SFA) | Oleic Acid  (C18:1) | Linoleic  Acid (C18:2) | Palmitoleic Acid (C16:0) | Total  Unsatured  Fatty Acids  (UFA) | Relation  UFA : SFA |
| 33.41±6.02 | 7.72±1.20 | 1.30±0.57 | 42.44 | 43.37±3.67 | 7.24±7.18 | 1.52±0.52 | 52.15 | 1.22 |
